# Supplementary material
Source: PubMed Central journal article supplement (PMC8086799)
Supplement: ehp7722.s001.acco.pdf [file ehp7722.s001.acco.pdf]

**Note to readers with disabilities:** *EHP* strives to ensure that all journal content is accessible to all readers. However, some figures and Supplemental Material published in *EHP* articles may not conform to [508 standards](#) due to the complexity of the information being presented. If you need assistance accessing journal content, please contact [ehp508@niehs.nih.gov](mailto:ehp508@niehs.nih.gov). Our staff will work with you to assess and meet your accessibility needs within 3 working days.

### **Supplemental Material**

#### **Risk-Based Chemical Ranking and Generating a Prioritized Human Exposome Database**

Fanrong Zhao, Li Li, Yue Chen, Yichao Huang, Tharushi Prabha Keerthisinghe, Agnes Chow, Ting Dong, Shenglan Jia, Shiwei Xing, Benedikt Warth, Tao Huan, and Mingliang Fang

#### **Table of Contents**

**Text S1.** Graphical User Interface (GUI) installation.

**Text S2.** HExpMetDB Functionality.

**Figure S1.** Relative contributions of exposure and LD<sub>50</sub> prediction uncertainty to differences between the 95<sup>th</sup> percentile and median PrHQ. Monte Carlo analysis of both exposure and LD<sub>50</sub> prediction uncertainty gives distributions that can be characterized by the ratio of the PrHQ for the 95th percentile to the median.

**Figure S2.** Database parameter selection display function.

**Figure S3.** Searching functions of HExpMetDB GUI. Using DHEP (117-81-7) as an example: (A) searching a chemical and its parameters by mass-charge-ratio (m/z); (B) searching predicted metabolites of a single chemical using the metabolite search module; and (C) searching predicted metabolites by the m/z.

**Additional File-** Excel Document

## **Text S1. Graphical User Interface (GUI) installation**

The GUI installer requires Java 8 (<https://www.oracle.com/java/technologies/javase/javase-jdk8-downloads.html>) under Windows or Mac OS operating system. Our first version of GUI package can be downloaded in the Supplementary Information named “HExpMetDB.rar”. The most updated GUI package is also available as an open access Java library at:

<https://github.com/FangLabNTU/HExpMetDB>

**Step 1:** Download package “HExpMetDB.zip for Win” or “HExpMetDB.zip for Mac” and unzip the file.

**Step 2:** For Windows system: Open the file → Double click the “run.bat” file, then the GUI will be automatically opened (maybe wait for a few seconds);

For **Mac OS** system: The snapshot of the file list can be found below. Open “Terminal.app” → Enter “cd+space+file path of “run.sh” in HExpMetDB package + carriage return” (e.g., cd+space+/Users/fan/Desktop/BIO/HExpMetDB\_for\_Mac+carriage return) → Enter “./run.sh”, then the GUI will be opened (shown as following figure).

|                 |                  |
|-----------------|------------------|
| copyright       | 2020/6/21 3:00   |
| cyp450_AB       | 2020/11/23 15:50 |
| ecbased_AB      | 2020/11/23 15:46 |
| HExpMetDB.class | 2020/11/25 15:44 |
| HExpMetDB.java  | 2020/11/25 15:44 |
| hgut_AB         | 2020/11/23 15:42 |
| Index\$1.class  | 2020/11/25 15:44 |
| Index\$2.class  | 2020/11/25 15:44 |
| Index\$3.class  | 2020/11/25 15:44 |
| Index.class     | 2020/11/25 15:44 |
| phaseI_AB       | 2020/11/23 15:48 |
| run             | 2020/11/25 15:46 |
| run.sh          | 2020/11/25 15:50 |
| total_matter    | 2020/11/25 11:00 |

HEExpMetDB\_for\_Mac — java — 80x24

```
Last login: Wed Nov 25 19:21:08 on console
fandeMacBook-Pro:~ fan$ cd /Users/fan/Desktop/BIO/HExpMetDB_for_Mac
fandeMacBook-Pro:HExpMetDB_for_Mac fan$ ./run.sh
```

HEExpMetDB

Search Database

Select a Search Type:  Select a Input Type:

Tolerance  Charge  Adducts



HEExpMetDB  
Version 1.0A, Developed by NTU, Singapore

## **Text S2. HExpMetDB Functionality**

We have developed a Java GUI client program running on JVM 1.8 under Windows and Mac OS operating system. Upon startup, it preloads the detailed information of all substances into a table. Users can pose queries by specifying a few keywords and retrieve their desired information in milliseconds. The HExpMetDB GUI contains compound search tab and database tab: When users open the database tab, users can browse our database and choose the parameters they want to display on the interface (Figure S2). Under the search tab, users can search chemicals as demonstrated in Figure S3. Specifically, the GUI allows users to do the following functions: (1) a single chemical search using a Chemical Abstracts Service Registry Number (CASRN), molecular formula, mass-charge-ratio (m/z) or adduct (Figure S3A); (2) searching predicted metabolites of a single chemical using the metabolite search module (Figure S3B); (3) searching predicted metabolites using the m/z, adducts or molecular formula (Figure S3C). Information including human exposure, animal toxicity LD<sub>50</sub>, ToxPi Score, their HQ (Hazard Quotient, LD<sub>50</sub> based) and Risk Index (ToxPi based) values as well as their ranking and confidence intervals were all given in “HExpMetDB” GUI. This platform would assist in a broad array of human exposure research and to facilitate chemical risk prioritization and metabolite identification.

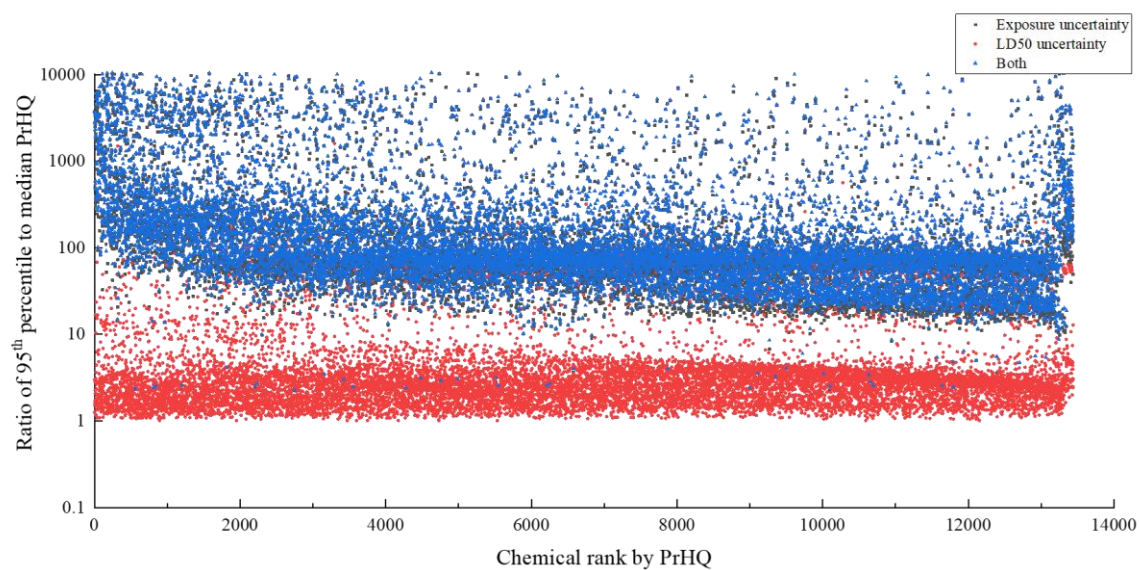

**Figure S1.** Relative contributions of exposure and LD<sub>50</sub> prediction uncertainty to differences between the 95<sup>th</sup> percentile and median PrHQ. Monte Carlo analysis of both exposure and LD<sub>50</sub> prediction uncertainty gives distributions that can be characterized by the ratio of the PrHQ for the 95<sup>th</sup> percentile to the median.

HEXpMetDB

Search Database

ID  CASRN  DTXSID  Name  IUPAC NAME  Molecular formula  Average mass  Monoisotopic mass  HLB (h)  SEEM3 (mg/kg-BW/day)  SEEM3 95%CI  Oral rat LD50 mol/kg  
 Oral rat LD50 95%CI  ToxCast number of active assay/total  Toxpi  ToxPI 95% CI  PrRID  PrRID 95%CI  PrHQ  PrHQ 95%CI  PrHQ Rank  RI  RI 95%CI  RI Rank  SMILES  
 QSAR ready SMILES  InChI String  InChIKey  logKow  logKoa

| ID | CASRN      | DTXSID        | Name                    | HLB (h) | SEEM3 (mg/kg--) | Toxpi | PrRID    | PrHQ     | PrHQ Rank | RI   | RI Rank |
|----|------------|---------------|-------------------------|---------|-----------------|-------|----------|----------|-----------|------|---------|
| 10 | 60-33-3    | DTXSID2025505 | Linoleic acid           | 2.30    | 7.40E-06        | 0.24  | 4.79E-01 | 1.54E-05 | 7515      | 0.15 | 394     |
| 11 | 84-66-2    | DTXSID7021780 | Diethyl phthalate       | 1.92    | 2.27E-04        | 0.05  | 9.53E-02 | 2.39E-03 | 638       | 0.15 | 394     |
| 12 | 85-68-7    | DTXSID3020205 | Benzyl butyl phth...    | 2.23    | 1.62E-04        | 0.18  | 8.45E-01 | 1.91E-04 | 2         | 0.15 | 394     |
| 13 | 80-05-7    | DTXSID7020182 | Bisphenol A             | 7.11    | 5.50E-05        | 0.38  | 2.07E-01 | 2.65E-04 | 2         | 0.15 | 394     |
| 14 | 100-02-7   | DTXSID0021834 | 4-Nitrophenol           | 0.90    | 1.12E-05        | 0.14  | 2.17E-02 | 5.19E-04 | 1616      | 0.09 | 1998    |
| 15 | 101-20-2   | DTXSID4026214 | Triclocarban            | 156.52  | 1.15E-07        | 0.34  | 4.28E-02 | 2.68E-06 | 11294     | 0.17 | 192     |
| 16 | 10265-92-6 | DTXSID6024177 | Methamidophos           | 4.84    | 2.48E-06        | 0.12  | 4.70E-04 | 5.28E-03 | 308       | 0.07 | 2637    |
| 17 | 106-48-9   | DTXSID1021871 | 4-Chlorophenol          | 11.02   | 3.82E-06        | 0.07  | 2.96E-02 | 1.29E-04 | 3189      | 0.04 | 4060    |
| 18 | 107-66-4   | DTXSID3040728 | Phosphoric acid...      | 5.51    | 5.98E-05        | 0.10  | 6.53E-02 | 9.15E-04 | 1181      | 0.07 | 2892    |
| 19 | 108-95-2   | DTXSID5021124 | Phenol                  | 3.30    | 3.17E-04        | 0.18  | 1.61E-02 | 1.97E-02 | 98        | 0.13 | 716     |
| 20 | 120-83-2   | DTXSID1020439 | 2,4-Dichloroph...       | 1.42    | 1.66E-05        | 0.22  | 3.35E-02 | 4.95E-04 | 1664      | 0.14 | 563     |
| 21 | 131-57-7   | DTXSID3022405 | 2-Hydroxy-4-met...      | 1.81    | 2.83E-04        | 0.18  | 2.30E-01 | 1.23E-03 | 964       | 0.13 | 805     |
| 22 | 134-62-3   | DTXSID2021995 | DEET                    | 1.70    | 1.52E-06        | 0.02  | 8.40E-02 | 1.81E-05 | 7164      | 0.01 | 7011    |
| 23 | 135-19-3   | DTXSID5027061 | 2-Naphthalenol          | 1.90    | 9.59E-06        | 0.25  | 5.91E-02 | 1.62E-04 | 2868      | 0.15 | 349     |
| 24 | 140-66-9   | DTXSID9022360 | 4,4',1,1',3,3'-Tetra... | 5.99    | 9.88E-07        | 0.33  | 9.48E-02 | 1.02E-05 | 8381      | 0.18 | 121     |
| 25 | 1563-38-8  | DTXSID2027414 | 2,3-Dihydro-2,2...      | 2.14    | 4.41E-06        | 0.08  | 1.81E-02 | 2.43E-04 | 2361      | 0.05 | 3672    |
| 26 | 1912-24-9  | DTXSID9020112 | Atrazine                | 63.54   | 1.08E-06        | 0.29  | 5.45E-02 | 1.98E-05 | 6999      | 0.16 | 253     |

Select what you need in the interface

Select a Metabolic Transformation: CYP450

| Molecular_fo... | Major_Isotop... | InChI          | Synonyms | InChIKey    | ALogP         | Precursor_ID | Precursor_In... | Precursor_In... | Precursor_A... | Reaction         | Reaction_ID | Metabolite_ID | Enzyme(s)    | Biosystem |
|-----------------|-----------------|----------------|----------|-------------|---------------|--------------|-----------------|-----------------|----------------|------------------|-------------|---------------|--------------|-----------|
| C15H16O3        | 244.109944...   | InChI=1S/C1... |          | HHOUSCIE... | 2.89189999... |              | InChI=1S/C1...  | IISBACLAFK...   |                | Hydroxylatio...  | BTMR1061    | BTM00001      | CYP1A2CYP... | HUMAN     |
| C15H16O3        | 244.109944...   | InChI=1S/C1... |          | YGFAMQHM... | 3.71520000... |              | InChI=1S/C1...  | IISBACLAFK...   |                | O-Hydroxylati... | BTMR1037    | BTM00002      | CYP1A2CYP... | HUMAN     |

Results: 2 records



HEXpMetDB  
Version 1.0A, developed by NTU, Singapore

1 **Figure S2.** Database parameter selection display function.

HEXpMetDB

Search Database

Select a Search Type: Parent compound  Select an Input Type: Mass  389.277

Tolerance 50 Charge Negative Adducts M-H

| ID    | CASRN      | DTXSID         | Name                           | IUPAC          | Molecular f... | HLB (h) | SEEM3 (...) | Oral rat LD... | Toxpi    | PrRID    | PrHQ     | PrHQ     | RI    | RI Ra... | In... | L... |     |
|-------|------------|----------------|--------------------------------|----------------|----------------|---------|-------------|----------------|----------|----------|----------|----------|-------|----------|-------|------|-----|
| 320   | 117-81-7   | DTXSID0520607  | D[2]-ethylhexyl phthalate      | Bis(2-C24H38O4 | ...            | 4.50    | 2.72E-03    | 5.92E-02       | 0.21     | 1.36E+00 | 2.00E-03 | 700      | 0.16  | 236      | ...   | ...  |     |
| 321   | 117-84-0   | DTXSID1021956  | Di-n-octyl phthalate           | Dioc...        | C24H38O4       | ...     | 1.92        | 3.94E-06       | 6.17E-02 | 0.18     | 1.21E+00 | 3.24E-06 | 10901 | 0.11     | 1321  | ...  | ... |
| 1047  | 6422-86-2  | DTXSID7027625  | Bis(2-ethylhexyl) terephtha... | Bis(2-C24H38O4 | ...            | 4.50    | 1.12E-01    | 4.57E-02       | 0.17     | 9.00E-01 | 1.24E-01 | 18       | 0.15  | 389      | ...   | ...  |     |
| 20456 | 131-15-7   | DTXSID0051655  | Bis(1-methylheptyl) phthal...  | Dioc...        | C24H38O4       | ...     | 4.35E-06    | 6.68E-02       | -        | 1.32E+00 | 3.31E-06 | 10856    | -     | -        | ...   | ...  |     |
| 20457 | 137-89-3   | DTXSID7024619  | Bis(2-ethylhexyl) isophthal... | Bis(2-C24H38O4 | ...            | ...     | 1.03E-05    | 5.70E-02       | -        | 1.12E+00 | 9.20E-06 | 8602     | -     | -        | ...   | ...  |     |
| 20458 | 25724-58-7 | DTXSID70874013 | Hexyl decyl phthalate          | Decyl...       | C24H38O4       | ...     | ...         | 6.34E-02       | -        | 1.28E+00 | -        | -        | -     | -        | ...   | ...  |     |
| 20459 | 81702-81-6 | DTXSID2099492  | Hexyl isodecyl phthalate       | Hexyl...       | C24H38O4       | ...     | 3.95E-06    | 6.38E-02       | -        | 1.26E+00 | 3.14E-06 | 10984    | -     | -        | ...   | ...  |     |
| 16546 | 54547-81-8 | DTXSID08202959 | 1-(7-Hexyl-9,10-dihydro-2...   | 1-(7-C28H38O   | ...            | 37.10   | 2.89E-07    | 3.30E-05       | -        | 6.50E-04 | 4.44E-04 | 1749     | -     | -        | ...   | ...  |     |
| 16552 | 54454-95-4 | DTXSID5099618  | 1-(7-Octyl-9,10-dihydroph...   | C28H38O        | ...            | 37.10   | -           | -              | -        | -        | -        | -        | -     | -        | ...   | ...  |     |

Select a Metabolic Transformation:

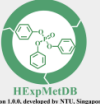

HEXpMetDB  
Version 1.0A, developed by NTU, Singapore

**B** HExpMetDB

Search Database

Select a Search Type: Parent compound Select an Input Type: Mass 389.277 Search

Tolerance: 50 Charge: Negative Adducts: M-H

| ID    | CASRN      | DTXSID         | Name                            | IUPA           | Molecular f | HLB (h)  | SEEM3    | Oral rat LD | Toxic    | PRD      | PHQ   | PHQ  | RI   | RI Ra | In | L |
|-------|------------|----------------|---------------------------------|----------------|-------------|----------|----------|-------------|----------|----------|-------|------|------|-------|----|---|
| 20    | 117-81-7   | DTXSID5020967  | Dib(2-ethylhexyl) phthalate     | Bis(2-C24H38O4 | 4.50        | 2.72E-03 | 6.92E-02 | 0.21        | 1.32E+00 | 2.00E-03 | 700   | 0.16 | 236  |       |    |   |
| 121   | 117-81-7   | DTXSID7021955  | Dib(2-ethylhexyl) phthalate     | Bis(2-C24H38O4 | 4.50        | 3.94E-06 | 6.17E-02 | 0.18        | 1.21E+00 | 3.22E-06 | 1050  | 0.11 | 1521 |       |    |   |
| 1047  | 6422-86-2  | DTXSID7027625  | Bis(2-ethylhexyl) terephthalate | Bis(2-C24H38O4 | 4.50        | 1.12E-01 | 4.57E-02 | 0.17        | 9.00E-01 | 1.24E-01 | 18    | 0.15 | 389  |       |    |   |
| 20456 | 131-15-7   | DTXSID0051655  | Bis(1-methylheptyl) phthalate   | Diocd-C24H38O4 | ...         | 4.35E-06 | 6.68E-02 | ...         | 1.32E+00 | 3.31E-06 | 10856 | -    | -    |       |    |   |
| 20457 | 137-89-3   | DTXSID7024619  | Bis(2-ethylhexyl) isophthalate  | Bis(2-C24H38O4 | ...         | 1.03E-05 | 5.70E-02 | ...         | 1.12E+00 | 9.20E-06 | 8602  | -    | -    |       |    |   |
| 20458 | 25724-58-7 | DTXSID70874013 | Hexyl decyl phthalate           | Decyl-C24H38O4 | ...         | ...      | 6.34E-02 | ...         | 1.25E+00 | ...      | ...   | -    | -    |       |    |   |
| 20459 | 81702-81-6 | DTXSID2069492  | Hexyl isodecyl phthalate        | Hexyl-C24H38O4 | ...         | 3.95E-06 | 6.38E-02 | ...         | 1.25E+00 | 3.14E-06 | 10984 | -    | -    |       |    |   |
| 16546 | 54547-81-8 | DTXSID80202969 | 1-(7-Hexyl-9,10-dihydro-2       | 1-(7-C28H38O   | 37.10       | 2.89E-07 | 3.30E-05 | ...         | 6.50E-04 | 4.44E-04 | 1749  | -    | -    |       |    |   |
| 16552 | 54454-95-4 | DTXSID50969618 | 1-(7-Octyl-9,10-dihydroph       | C28H38O        | 37.10       | ...      | ...      | ...         | ...      | ...      | ...   | -    | -    |       |    |   |

Select a Metabolic Transformation: CYP450 Click

| Molecular_fo | Major_Isotop | InChI       | Synonyms  | InChIKey    | ALogP | Precursor_ID | Precursor_In | Precursor_In | Precursor_A | Reaction      | Reaction_ID | Metabolite_ID | Enzyme(s) | Biosystem |
|--------------|--------------|-------------|-----------|-------------|-------|--------------|--------------|--------------|-------------|---------------|-------------|---------------|-----------|-----------|
| C24H38O5     | 406.271924   | InChI=1S/C2 | FAPSLTONK | -0.51319999 |       |              | InChI=1S/C2  | BJOHLKABX    |             | Hydroxylation | BTMR1045    | BTM00001      | CYP2C8CYP | HUMAN     |
| C24H38O5     | 406.271924   | InChI=1S/C2 | VEVSWAOR  | -0.51319999 |       |              | InChI=1S/C2  | BJOHLKABX    |             | Hydroxylation | BTMR1047    | BTM00002      | CYP2C8CYP | HUMAN     |
| C24H38O5     | 406.271924   | InChI=1S/C2 | VVVVPAJEU | -0.46849999 |       |              | InChI=1S/C2  | BJOHLKABX    |             | Hydroxylation | BTMR1074    | BTM00003      | CYP2C8CYP | HUMAN     |
| C24H38O5     | 406.271924   | InChI=1S/C2 | XEWFUJZKJ | -0.46849999 |       |              | InChI=1S/C2  | BJOHLKABX    |             | Hydroxylation | BTMR1074    | BTM00004      | CYP2C8CYP | HUMAN     |
| C24H38O5     | 406.271924   | InChI=1S/C2 | FNBFFOZGW | -0.74580000 |       |              | InChI=1S/C2  | BJOHLKABX    |             | Hydroxylation | BTMR1061    | BTM00005      | CYP2C8CYP | HUMAN     |
| C24H38O5     | 406.271924   | InChI=1S/C2 | VBHVVLXWI | -0.74580000 |       |              | InChI=1S/C2  | BJOHLKABX    |             | Hydroxylation | BTMR1061    | BTM00006      | CYP2C8CYP | HUMAN     |
| C24H36O4     | 388.261359   | InChI=1S/C2 | DTVJUBFLG | 1.24200000  |       |              | InChI=1S/C2  | BJOHLKABX    |             | Terminal de   | BTMR1190    | BTM00007      | CYP2C8CYP | HUMAN     |
| C24H36O4     | 388.261359   | InChI=1S/C2 | HGLVLYPXB | 0.69840000  |       |              | InChI=1S/C2  | BJOHLKABX    |             | Terminal de   | BTMR1190    | BTM00008      | CYP2C8CYP | HUMAN     |
| C24H38O5     | 406.271924   | InChI=1S/C2 | ALSKJINZS | -1.4933     |       |              | InChI=1S/C2  | BJOHLKABX    |             | Epoxidation   | BTMR1028    | BTM00009      | CYP2C8CYP | HUMAN     |
| C24H38O5     | 406.271924   | InChI=1S/C2 | VDPSPBYB  | -0.68489999 |       |              | InChI=1S/C2  | BJOHLKABX    |             | Hydroxylation | BTMR0053    | BTM00010      | CYP2C8CYP | HUMAN     |

HExpMetDB  
Version 1.0.0, developed by NTL, Singapore

**C** HExpMetDB

Search Database

Select a Search Type: metabolite Select an Input Type: Mass 406.2719 Search

Tolerance: 20 Charge: Neutral Adducts:

| Molecular_fo | Major_Isotop | InChI      | Synonyms  | InChIKey    | ALogP | Precursor_ID | Precursor_In | Precursor_In | Precursor_A | Reaction      | Reaction_ID | Metabolite_ID | Enzyme(s) | Biosystem | Source    |
|--------------|--------------|------------|-----------|-------------|-------|--------------|--------------|--------------|-------------|---------------|-------------|---------------|-----------|-----------|-----------|
| C24H38O5     | 406.271924   | InChI=1S/C | VVVVPAJEU | -0.46849999 |       |              | InChI=1S/C   | BJOHLKAB     |             | Hydroxylation | BTMR1074    | BTM00003      | CYP2C8CYP | HUMAN     | CYP450: C |
| C24H38O5     | 406.271924   | InChI=1S/C | OSULZORP  | -2.24280000 |       |              | InChI=1S/C   | MOIUGAXC     |             | Hydroxylation | BTMR1047    | BTM00001      | CYP3A4    | HUMAN     | CYP450: C |
| C24H38O5     | 406.271924   | InChI=1S/C | BNTRAWD   | -1.4933     |       |              | InChI=1S/C   | RWPCVVB      |             | Epoxidation   | BTMR1028    | BTM00006      | CYP2C8CYP | HUMAN     | CYP450: C |
| C24H38O5     | 406.271924   | InChI=1S/C | VDPSPBYB  | -0.68489999 |       |              | InChI=1S/C   | BJOHLKAB     |             | Hydroxylation | BTMR0053    | BTM00010      | CYP2C8CYP | HUMAN     | CYP450: C |
| C24H38O5     | 406.271924   | InChI=1S/C | VYVZCOUJ  | -0.46849999 |       |              | InChI=1S/C   | RWPCVVB      |             | Hydroxylation | BTMR1074    | BTM00003      | CYP2C8CYP | HUMAN     | CYP450: C |
| C24H38O5     | 406.271924   | InChI=1S/C | COQAJUDJ  | -3.22290000 |       |              | InChI=1S/C   | MOIUGAXC     |             | Epoxidation   | BTMR1028    | BTM00003      | CYP3A4    | HUMAN     | CYP450: C |
| C24H38O5     | 406.271924   | InChI=1S/C | ALSKJINZS | -1.4933     |       |              | InChI=1S/C   | BJOHLKAB     |             | Epoxidation   | BTMR1028    | BTM00009      | CYP2C8CYP | HUMAN     | CYP450: C |
| C24H38O5     | 406.271924   | InChI=1S/C | FAPSLTONK | -0.51319999 |       |              | InChI=1S/C   | BJOHLKAB     |             | Hydroxylation | BTMR1045    | BTM00001      | CYP2C8CYP | HUMAN     | CYP450: C |
| C24H38O5     | 406.271924   | InChI=1S/C | PYEJENGZ  | -0.74580000 |       |              | InChI=1S/C   | RWPCVVB      |             | Hydroxylation | BTMR1061    | BTM00005      | CYP2C8CYP | HUMAN     | CYP450: C |
| C24H38O5     | 406.271924   | InChI=1S/C | QPAGZXGJ  | -2.24280000 |       |              | InChI=1S/C   | MOIUGAXC     |             | Hydroxylation | BTMR1045    | BTM00004      | CYP3A4    | HUMAN     | CYP450: C |
| C24H38O5     | 406.271924   | InChI=1S/C | VEVSWAOR  | -0.51319999 |       |              | InChI=1S/C   | BJOHLKAB     |             | Hydroxylation | BTMR1047    | BTM00002      | CYP2C8CYP | HUMAN     | CYP450: C |
| C24H38O5     | 406.271924   | InChI=1S/C | VBHVVLXWI | -0.74580000 |       |              | InChI=1S/C   | BJOHLKAB     |             | Hydroxylation | BTMR1061    | BTM00006      | CYP2C8CYP | HUMAN     | CYP450: C |
| C24H38O5     | 406.271924   | InChI=1S/C | ALOZYZYW  | -0.46849999 |       |              | InChI=1S/C   | RWPCVVB      |             | Hydroxylation | BTMR1074    | BTM00002      | CYP2C8CYP | HUMAN     | CYP450: C |
| C24H38O5     | 406.271924   | InChI=1S/C | WKAAYQY   | -0.74580000 |       |              | InChI=1S/C   | RWPCVVB      |             | Hydroxylation | BTMR1061    | BTM00004      | CYP2C8CYP | HUMAN     | CYP450: C |
| C24H38O5     | 406.271924   | InChI=1S/C | VCMNQOQB  | -0.68489999 |       |              | InChI=1S/C   | RWPCVVB      |             | Hydroxylation | BTMR0053    | BTM00007      | CYP2C8CYP | HUMAN     | CYP450: C |
| C24H38O5     | 406.271924   | InChI=1S/C | UYCZPSUV  | -2.19909999 |       |              | InChI=1S/C   | MOIUGAXC     |             | Hydroxylation | BTMR1074    | BTM00005      | CYP3A4    | HUMAN     | CYP450: C |
| C24H38O5     | 406.271924   | InChI=1S/C | WLQJWJGX  | -0.51319999 |       |              | InChI=1S/C   | RWPCVVB      |             | Hydroxylation | BTMR1045    | BTM00001      | CYP2C8CYP | HUMAN     | CYP450: C |
| C24H38O5     | 406.271924   | InChI=1S/C | XEWFUJZKJ | -0.46849999 |       |              | InChI=1S/C   | BJOHLKAB     |             | Hydroxylation | BTMR1074    | BTM00004      | CYP2C8CYP | HUMAN     | CYP450: C |
| C24H38O5     | 406.271924   | InChI=1S/C | FNBFFOZGW | -0.74580000 |       |              | InChI=1S/C   | BJOHLKAB     |             | Hydroxylation | BTMR1061    | BTM00005      | CYP2C8CYP | HUMAN     | CYP450: C |
| C24H38O5     | 406.271924   | InChI=1S/C | ZWNMEQY   | -2.47539999 |       |              | InChI=1S/C   | MOIUGAXC     |             | Hydroxylation | BTMR1061    | BTM00002      | CYP3A4    | HUMAN     | CYP450: C |

HExpMetDB  
Version 1.0.0, developed by NTL, Singapore

**Figure S3.** Searching functions of HExpMetDB GUI. Using DHEP (117-81-7) as an example: (A) searching a chemical and its parameters by mass-charge-ratio (m/z); (B) searching predicted metabolites of a single chemical using the metabolite search module; and (C) searching predicted metabolites by the m/z.
