# Supplementary material
Source: PubMed Central journal article supplement (PMC8086799)
Supplement: ehp7722.smcontents.508.pdf [file ehp7722.smcontents.508.pdf]

**Note to readers with disabilities:** *EHP* strives to ensure that all journal content is accessible to all readers. However, some figures and Supplemental Material published in *EHP* articles may not conform to [508 standards](#) due to the complexity of the information being presented. If you need assistance accessing journal content, please contact [ehp508@niehs.nih.gov](mailto:ehp508@niehs.nih.gov). Our staff will work with you to assess and meet your accessibility needs within 3 working days.

### **Supplemental Material**

#### **Risk-Based Chemical Ranking and Generating a Prioritized Human Exposome Database**

Fanrong Zhao, Li Li, Yue Chen, Yichao Huang, Tharushi Prabha Keerthisinghe, Agnes Chow, Ting Dong, Shenglan Jia, Shiwei Xing, Benedikt Warth, Tao Huan, and Mingliang Fang

#### **Table of Contents**

**Text S1.** Graphical User Interface (GUI) installation.

**Text S2.** HExpMetDB Functionality.

**Figure S1.** Relative contributions of exposure and LD<sub>50</sub> prediction uncertainty to differences between the 95<sup>th</sup> percentile and median PrHQ. Monte Carlo analysis of both exposure and LD<sub>50</sub> prediction uncertainty gives distributions that can be characterized by the ratio of the PrHQ for the 95th percentile to the median.

**Figure S2.** Database parameter selection display function.

**Figure S3.** Searching functions of HExpMetDB GUI. Using DHEP (117-81-7) as an example: (A) searching a chemical and its parameters by mass-charge-ratio (m/z); (B) searching predicted metabolites of a single chemical using the metabolite search module; and (C) searching predicted metabolites by the m/z.

**Additional File-** Excel Document
